# Supplementary material for: FaNPR3 Members of the NPR1-Like Gene Family Negatively Modulate Strawberry Fruit Resistance against Colletotrichum acutatum
Source: Preprints.org preprint supplement (doi:10.20944/preprints202407.2069.v1), 2024-07-25

**Supplementary Figure S1.** Expression of the defense-related genes *PR1*, *PR2*, and *PR5* in *Arabidopsis* SA treated seedlings. Relative expression level was monitored by qRT-PCR in control and SA treated seedlings 1 day post treatment (200 $\mu$ M) in WT, WT::FaNPR32, double mutant *npr3npr4*, and *npr3npr4::FaNPR32* (black, grey, white and striped bars, respectively). Expression levels were normalized with respect to the internal control *ACTIN2* and displayed relative to the expression in mock-treated samples that were given a value of 1. Bars, mean  $\pm$  standard error. Note the different scales in the relative expression level axis. Statistical significance was determined by one-way ANOVA. Letters indicate significant differences ( $p < 0.05$ ) as per HSD Tukey's post-hoc test.

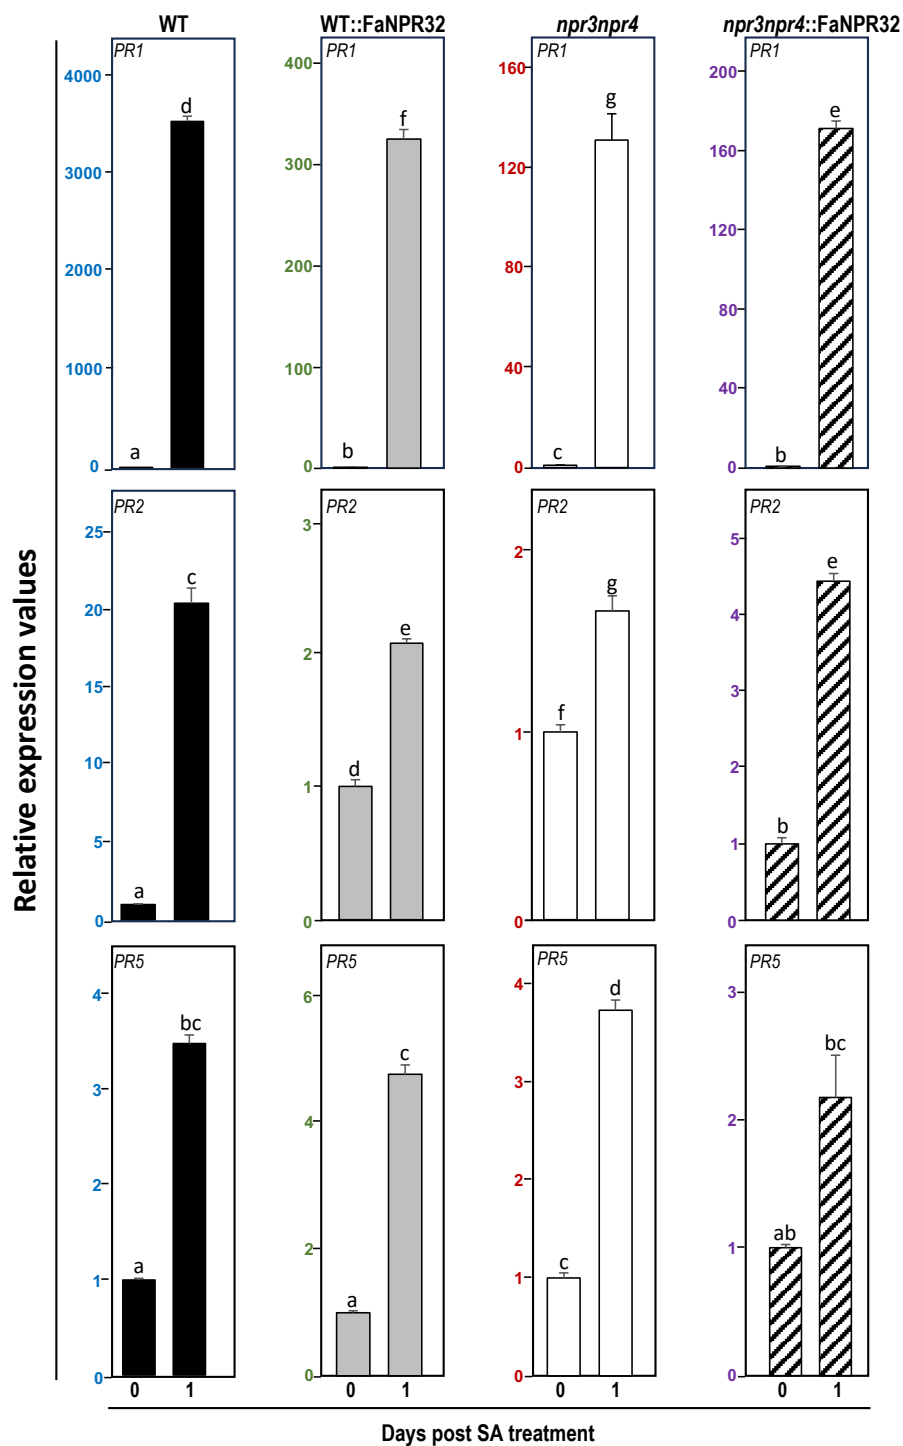

Supplement: Supplementary file 1 [file supplementary]
