# Supplementary material for: FaNPR3 Members of the NPR1-Like Gene Family Negatively Modulate Strawberry Fruit Resistance against Colletotrichum acutatum
Source: Preprints.org preprint supplement (doi:10.20944/preprints202407.2069.v1), 2024-07-25
Supplement: Supplementary file 6 [file supplementary]

**Supplementary Table S1.** List of primers used in this work.

| <b>Fragaria ananassa Gene/Reference</b> | <b>Primer name</b>                           |
|-----------------------------------------|----------------------------------------------|
| <i>FaNPR3.1</i>                         | FaN31pENT<br>iQFaNPR3.1                      |
| <i>FaNPR3.2</i>                         | attB-533RNAi<br>attB-FaNPR3.2<br>iQ-FaNPR3.2 |
| <i>FaNPR3.3</i>                         | iQ-FaNPR3.3                                  |
| <i>FaPR1.1*</i>                         | iQFaPR1.1                                    |
| <i>FaPR2.1*</i>                         | iQFaPR2.1                                    |
| <i>FaPR5.2*</i>                         | IQFaPR5.2                                    |
| <i>FaWRKY24*</i>                        | iQFaWRKY24                                   |
| <i>FaWRKY19*</i>                        | iQFaWRKY19                                   |
| <i>FaACT.1*</i>                         | iQFaACT-1                                    |
| <i>FaEF1a*</i>                          | iQFaEF1a                                     |

  

| <b>Arabidopsis Gene ID</b> | <b>Primer name</b> |
|----------------------------|--------------------|
| At3g18780                  | iQAtACTIN2         |
| AT4G19660                  | iQAtPR1            |
| At3g57260                  | iQAtPR2            |
| At1g75040                  | iQAtPR5            |
| AT1G64280                  | iQAtNPR1           |
| AT5G45110                  | iQAtNPR3           |
| AT4G19660                  | iQAt NPR4          |

\* Information published in Amil-Ruiz et al. 2016 [45]

---

**Forward primer sequence (5'-3')**

CACCATGGCGAATTCAGGTGAGCC  
ATAAGTTTATGGAGGATGACCTGCCT  
GGGGACAAGTTTGTACAAAAAAGCAGGCTTCCATCTTTGAGGAGAAGTGCGG  
GGGGACAAGTTTGTACAAAAAAGCAGGCTTAACAATGGATCATATGAATGACCTTTCGTCATCTT  
GCTGCAAAACAGGGGTCACTCTTGA  
TGGATGATCTCGGTATGGGTGATTAC  
TGCTAATTCACATTATGGCG  
AAGATGGACAATATGGCTACCAGA  
CCAATTCCCAAATGTCCCTCATCTTGAT  
ACAGCAGTAAGATTAGGGATGAAGAAGGGAG  
CAAGTCAGGAGGAGGGGATGAGTA  
GGGCCAGAAAGATGCTTATGTCGG  
TGGATTTGAGGGTGACAACATGA

---

**Forward primer sequence (5'-3')**

GCCGAGATTCTTGCTCTGGA  
TATGCTCGGAGCTACGCAGAA  
CTCGACTCGGTTTATGCAGCA  
GGCGATGGAGGATTTGAATTG  
GAATCCGTCTTTGACTCGCC  
TAACTGCGCTACGTCCGTCA  
ATGCCCCGAGGATCTCCAAAT

---

**Reverse primer sequence (5'-3')**

GTGTAAATCACAAGACTAGAAATAGGGTG  
CTATTTTCTAGTCTTGTGATTTACAC  
GGGACCACTTTGTACAAGAAAGCTGGGTAGCCCCCTTAATAAGACGACCATA  
GGGGACCACTTTGTACAAGAAAGCTGGGTC TCAGCTTGGCCTTTTCCTAACCTTAC  
CAGCTTGGCCTTTTCCTAACCTTACGAT  
TCATGTGGATGTCAAAACAGACTGGT  
GTTAGAGTTGTAATTATAGTAGG  
AACTCTCGCATTCTCCTTTGTAGTTA  
AGTGTAAGGGGCACTCGTTACGGATTTCA  
GCTTCTTCACATTGCAACCCTGATGCGTG  
ATCCATCATCAAGAATATCAATGTCACT  
GGGCAACACGAAGCTCATTGTAGAAG  
GTATACATCCTGAAGTGGTAGACGGAGG

---

**Reverse primer sequence (5'-3')**

TAACTGCGCTACGTCCGTCA  
TCGCTAACCCACATGTTACAG  
TTTTCCACACTCGTCCCGACT  
GCGTCAAAGTTGCAGCCTGTA  
GCGGTGTTGTTGGAGTCTTT  
GCCGAGATTCTTGCTCTGGA  
GGCTTCTGCTGGGAAGAACA

---

**Analysis/target**

Cloning *FaNPR3.1*

RT-qPCR/ *FaNPR3.1* expression

Silencing *FaNPR3.2* members

Cloning *FaNPR3.2*

RT-qPCR/ *FaNPR3.2* expression

RT-qPCR/ *FaNPR3.3* expression

RT-qPCR/ *FaPR1.1* expression

RT-qPCR/ *FaPR2.1* expression

RT-qPCR/ *FaPR5.2* expression

RT-qPCR/ *FaWRKY24* expression

RT-qPCR/ *FaWRKY19* expression

RT-qPCR/ internal standard

RT-qPCR/ internal standard

---

**Analysis/target**

RT-qPCR/ internal standard

RT-qPCR/ *AtPR1* expression

RT-qPCR/ *AtPR2* expression2

RT-qPCR/ *AtPR5* expression

RT-qPCR/ *AtNR1* expression

RT-qPCR/ *AtNPR3* expression

RT-qPCR/ *AtNPR4* expression
