# Supplementary material for: FaNPR3 Members of the NPR1-Like Gene Family Negatively Modulate Strawberry Fruit Resistance against Colletotrichum acutatum
Source: Preprints.org preprint supplement (doi:10.20944/preprints202407.2069.v1), 2024-07-25
Supplement: Supplementary file 10 [file supplementary]

**Supplementary Figure S2.** The 533bp *FvNPR3.2* cDNA fragment for RNAi silencing. Position of the forward attB1-533RNAi and attB2-533RNAi reverse primers, are labelled in red-dark green and red-light green, respectively. Primer sequences are listed in Supplementary Table S1.

**GGGGACAAGTTTGTACAAAAAGCAGGCTTCATCTTTGAGGAGAAGTGCGG**CTTTTGCTATATTCG  
GTCAATACCATTGAGATCTTCTTGGAAGCTGTCAAGCTGCTGCTTCAACTTGTCAAGTCCTCATTGAATT  
TCATAGCATCTTTAAGAAGGAGAATAGTCCTTGTTGATCAGAAGGCTCAGCCTCATCTTCTTCATCATCT  
CAAGCTGTGTTGCTGTTCACCTAAGCTTAAAAGTCAAAAGGGTGCGTCTTAATCTGTACGCAGTCTTTCTC  
CCTTTGTGCTTTTTGTCAATAATTTTAAGGGTTGAAGGGTGTTTGTGGTTTCTGAGTTTGAGTAGTGCAA  
GGTTTGGTTTTGATGAAGATCCAAGTCATATGTGTATTGGGAAGTTCAGGATTACTACCTCAAGTTGTGT  
ACCTAGCTCTACTCAGAAATTGTTCTTGGGATTTGCTTTGGATGAATTCTCAAACCTGGGTGAGCTTAGT  
ATGCTTTTATCTGTTACATTATGCAGGCTTGCATCAGAAATGATGATATGGTTCGTCTTATTAAGGGGGCT  
**ACCCAGCTTTCTTGTACAAAGTGGTCCC**
